# Supplementary material
Source: publisher site journal article supplement (https://www.dovepress.com/article/462721)
Supplement: Supplementary file 1 [file get_supplementary_file.php]

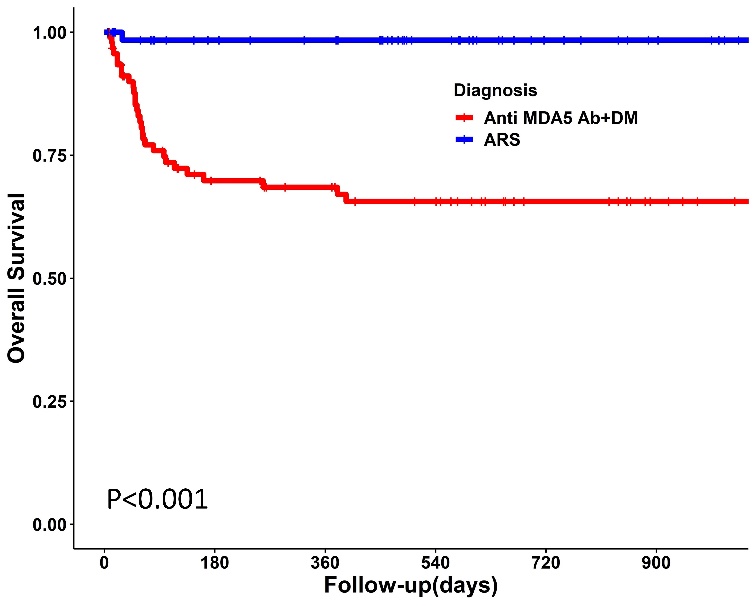


**Supplementary Figure 1.** Kaplan–Meier survival curves of patients with anti-MDA5 antibody positive DM and ASyS. MDA5, melanoma differentiation-associated gene 5; ASyS, anti-synthetase syndrome.

**A B**


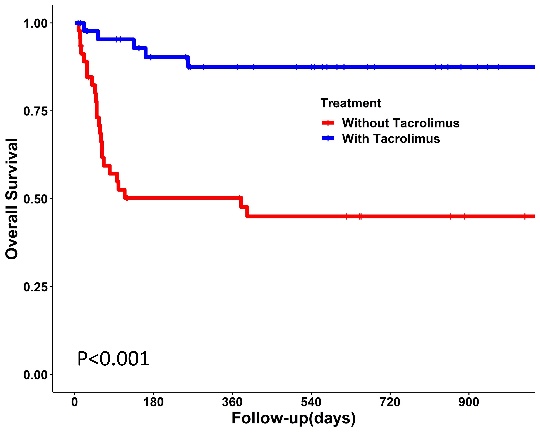

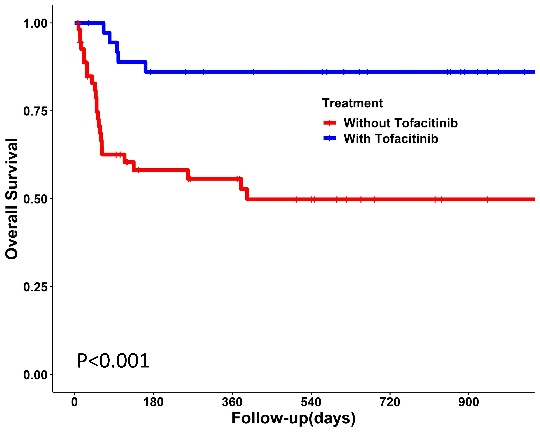


**Supplementary Figure 2**. Survival curves of anti-MDA5 positive DM patients according to the treatment. **(A)** Survival rates in patients treated with tacrolimus and without tacrolimus. **(B)** Survival rates in patients treated with tofacitinib and without tofacitinib.

**A B**


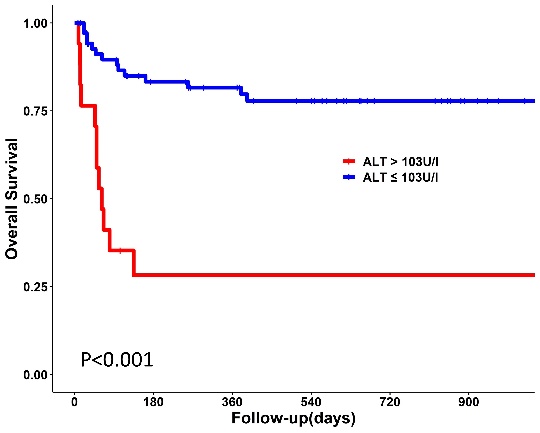

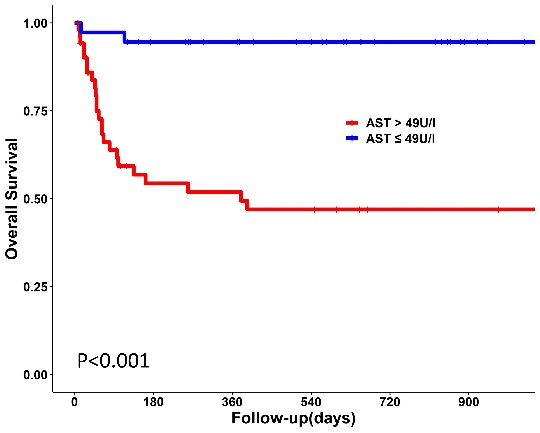


**C D**


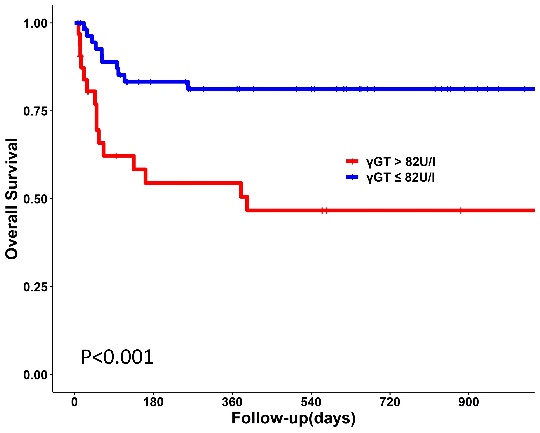

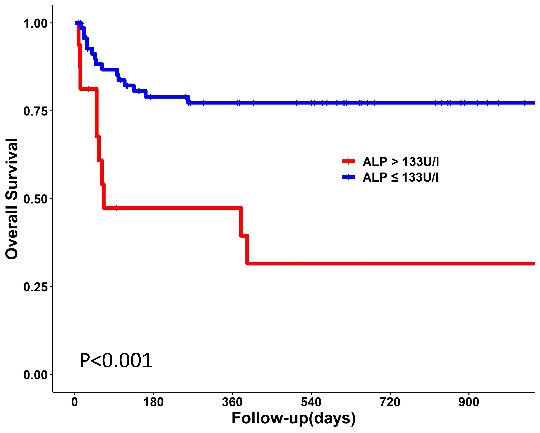


**E F**


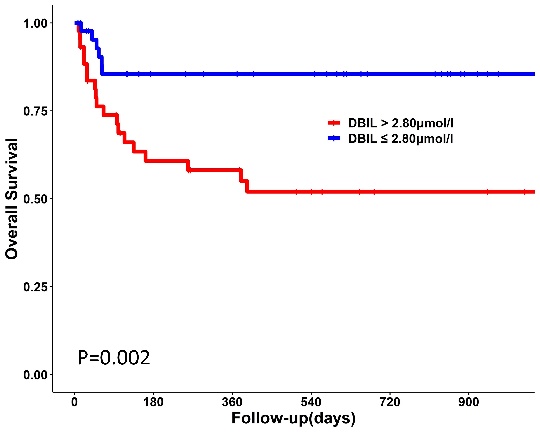

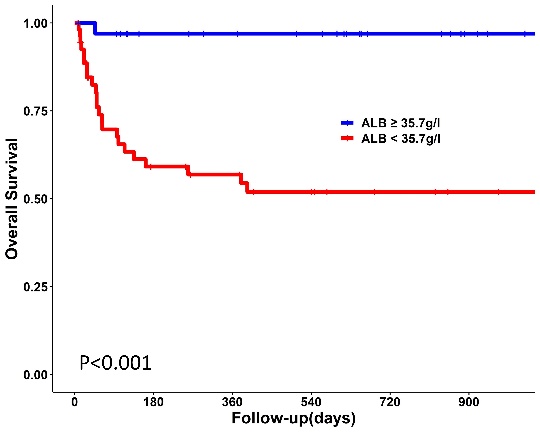


**G H**


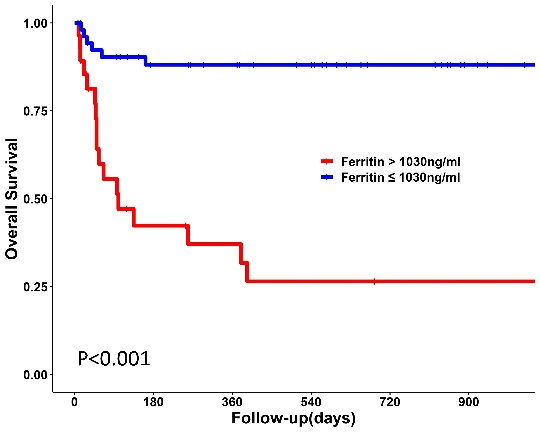

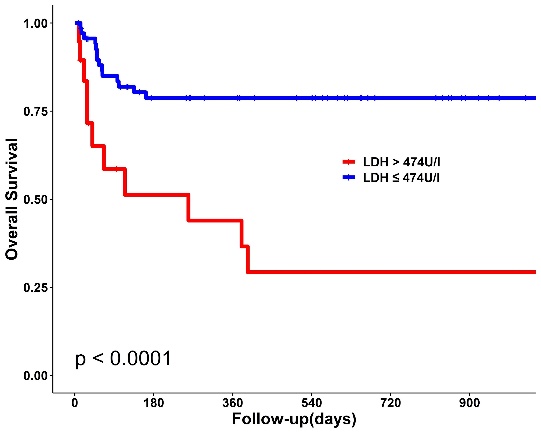


**Supplementary Figure 3.** Survival curves of anti-MDA5 positive DM patients stratified by level of initial ALT **(A)**, AST **(B)**, γGT **(C)**, ALP **(D)**, DBIL**(E)**, ALB **(F),** ferritin **(G)** andLDH **(H)**. ALT, alanine aminotransferase; AST, aspartate aminotransferase; γGT, γ-glutamyl transferase; ALP, alkaline phosphatase; DBIL, direct bilirubin; ALB, albumin; LDH, lactate dehydrogenase.
